# 1 **A connectome-based neuromarker of the non-verbal number acuity** 2 **and arithmetic skills**

3  
4 Dai Zhang<sup>1,2</sup>, Liqin Zhou<sup>1</sup>, Anmin Yang<sup>1</sup>, Shanshan Li<sup>1</sup>, Chunqi Chang<sup>2</sup>, Ke Zhou<sup>1\*</sup>, Jia Liu<sup>3\*</sup>

5  
6 <sup>1</sup> Beijing Key Laboratory of Applied Experimental Psychology, School of Psychology, Beijing Normal  
7 University, Beijing, China

8 <sup>2</sup> Guangdong Key Laboratory for Biomedical Measurements and Ultrasound Imaging, School of Biomedical  
9 Engineering, Shenzhen University, Shenzhen, China

10 <sup>3</sup> Department of Psychology & Tsinghua Laboratory of Brain and Intelligence, Tsinghua University, Beijing,  
11 China

12  
13  
14  
15 \* Correspondence to:

16 Ke Zhou, Ph.D

17 Beijing Key Laboratory of Applied Experimental Psychology,

18 School of Psychology, Beijing Normal University

19 No. 19, Xijiekouwai Street, Haidian District, Beijing 100875, China

20 E-mail: [kzhou@bnu.edu.cn](mailto:kzhou@bnu.edu.cn)

21 ORCID: <https://orcid.org/0000-0003-4773-758X>

22  
23 Jia Liu, Ph.D

24 Department of Psychology & Tsinghua Laboratory of Brain and Intelligence,

25 Tsinghua University

26 No. 30, Shuangqing Rd, Haidian District, Beijing 100084, China

27 E-mail: [liujiaTHU@tsinghua.edu.cn](mailto:liujiaTHU@tsinghua.edu.cn)

28 ORCID: <https://orcid.org/0000-0003-0383-0934>

## 1 **Abstract**

2       The approximate number system (ANS) is vital for survival and reproduction in animals  
3 and crucial in constructing abstract mathematical abilities in humans. Most previous  
4 neuroimaging studies focused on identifying discrete brain regions responsible for the ANS and  
5 characterizing their functions in numerosity perception. However, there lacks a neuromarker to  
6 characterize an individual's ANS acuity, especially one based on the whole-brain functional  
7 connectivity (FC). Here, we identified a distributed brain network (i.e., numerosity network)  
8 using a connectome-based predictive modeling (CPM) analysis on the resting-state functional  
9 magnetic resonance imaging (rs-fMRI) data based on a large sample size. The summed strength  
10 of all FCs within the numerosity network could reliably predict individual differences of the  
11 ANS acuity in behavior. Furthermore, in an independent dataset from the Human Connectome  
12 Project (HCP), we found that the summed FC strength within the numerosity network could also  
13 predict individual differences in arithmetic skills. Our findings illustrate that the numerosity  
14 network we identified could be an applicable neuromarker of the non-verbal number acuity and  
15 might serve as the neural basis underlying the known link between the non-verbal number acuity  
16 and mathematical abilities.

17

18

19

20 **Keywords:** Approximate number system, Numerosity, Connectome-based predictive  
21 modeling, Arithmetic skills, individual differences

22

## 1 **Introduction**

2       The number of items in a set is represented in humans by two different representational  
3 systems: a language-dependent cultural system that encodes the precise cardinality of elements <sup>1</sup>;  
4 and an approximate number system (ANS) shared by adults <sup>2,3</sup>, infants <sup>4</sup>, many animal species <sup>5</sup>,  
5 <sup>6,7</sup>, and even deep convolutional neural networks <sup>8,9,10</sup>, which encodes quantity in an  
6 approximate, non-symbolic manner without verbally counting (i.e., numerosity perception). In  
7 animals, the ANS is of evolutionary importance as it can guide behaviors necessary for survival  
8 and reproduction, such as determining the relative amount of food during foraging <sup>11,12</sup>. In  
9 humans, the ANS is hypothesized to be the foundation of constructing more abstract  
10 mathematical abilities <sup>13</sup>. For example, Harvey *et al.* <sup>14</sup> revealed a positive correlation between  
11 ANS acuity and math achievement, indicating the importance of ANS in shaping symbolic math  
12 skills.

13       Over decades, significant progress has been made to understand how numerosity  
14 information is represented in the brain. For instance, neurophysiological studies revealed that  
15 neurons in the prefrontal and parietal cortices of macaques were tuned to the numerosity of  
16 spatial arrays <sup>15,16,17,18</sup>. In humans, using the fMRI approach, researchers have also found that  
17 the numerosity information was mainly represented in the frontoparietal association cortex,  
18 including the horizontal part of the intraparietal sulcus, which exhibited similar tuning to  
19 numerosity <sup>19,20,21,22</sup> (add He *et al.*, PNAS,2015). However, recent new evidence showed that  
20 other brain areas were also involved in processing numerosity information. For example, Harvey  
21 <sup>23</sup> has proposed a numerical neural system including visual cortex, inferior temporal gyrus (ITG),  
22 fusiform gyrus, and angular gyrus, in addition to the parietal lobe and prefrontal cortex. The  
23 earliest numerosity-related neural activity has also been found in the visual cortex, such as V2

1 and V3<sup>24,25</sup>, and numerosity information could be decoded in both the early visual and intra-  
2 parietal cortex<sup>26</sup>. Number neurons were also found in the medial temporal lobe (MTL) of human  
3 neurosurgical patients when they performed calculation tasks on symbolic and non-symbolic  
4 stimuli<sup>27</sup>. The angular gyrus also plays a central role in the linguistic number representation  
5 system<sup>28,29</sup>. Taken together, the neural representation of the ANS system seems to involve  
6 multiple cortical areas. However, most of these previous studies focused on identifying the  
7 function of specific brain regions supporting the ANS. There still lacks a connectome-wise  
8 neuromarker based on whole-brain functional connectivity (FC) that can characterize an  
9 individual's ANS acuity.

10 FC measures the activity synchronization or interaction between fMRI bold oxygen level-  
11 dependent (BOLD) signals of two brain areas<sup>30,31</sup>. Whole-brain FC analysis based on network  
12 theory provides information on how distributed brain regions simultaneously exchange or  
13 integrate information to support specific cognitive functions<sup>32</sup>. Recently, a connectome-based  
14 modeling (CPM) analysis<sup>33</sup> has been proposed to predict individual differences in human  
15 behavior (e.g., cognitive abilities) based on participants' whole-brain FC pattern. The CPM  
16 analysis provides a complementary measure of human cognitive abilities to traditional  
17 approaches that focused on specific functions of discrete brain regions. The CPM approach can  
18 be successfully applied to predict individual differences in several cognitive abilities, such as  
19 fluid intelligence (gF)<sup>34</sup>, sustained attention<sup>35</sup>, reading accuracy<sup>36</sup>, and creative ability<sup>37</sup>.  
20 Because substantial variations also exist in the ANS acuity among individuals<sup>14,38,39</sup>, here in the  
21 present study, we aimed to employ the CPM analysis to develop a whole-brain neuromarker (i.e.,  
22 numerosity network) for the ANS acuity based on the resting-state fMRI data.

1           In addition, previous studies also illustrated that the CPM identified with one task could be  
2   generalized to predict the performance of other related tasks. For instance, sustained attention  
3   CPM, derived from healthy individuals in a sustained attention task, could also predict the  
4   ADHD-Rating-Scale (ADHD-RS) score in the ADHD patients <sup>35</sup>, and the reading recall accuracy  
5   in another group of healthy individuals <sup>36</sup>. As mentioned above, because the ANS plays a crucial  
6   role in determining an individual's math achievement <sup>14</sup>, the second aim of the present study is to  
7   examine whether the numerosity network that we identified above could also predict an  
8   individual's arithmetic skills.

9           Specifically, in a large sample dataset (n>250), we measured each individual's ANS acuity  
10  (i.e., numerosity precision) using a dot-array number comparison (NC) task <sup>14</sup>. We then  
11  constructed a numerosity CPM based on their resting-state fMRI data to predict the individual  
12  differences in ANS acuity, using a leave-one-out (LOO) cross-validation procedure. As a result,  
13  the summed FC strength within the numerosity network could predict individual differences of  
14  the ANS in the left-out participant. More importantly, we further examined whether the  
15  numerosity network can predict the performance of arithmetic skills in an independent dataset  
16  from the Human Connectome Project (HCP). Our results suggested that the summed FC strength  
17  within the numerosity network could also predict individual differences in arithmetic skills, not  
18  language comprehension abilities. In sum, our findings demonstrate that the ANS acuity can be  
19  reliably predicted from the strength of the numerosity network of each individual, and imply that  
20  the numerosity network might also serve as the neural basis underlying the known link between  
21  ANS acuity and mathematical ability.

22

## 23   **Results**

## 1 **Behavioral performance**

2       The present investigation included an ANS dataset and an HCP math/story dataset. The  
3 ANS dataset consisted of a primary dataset and a validating dataset. It was used to obtain and  
4 verify the numerosity network. The HCP math/story dataset was used to investigate whether the  
5 numerosity network identified in the previous ANS dataset could predict individual differences  
6 in arithmetic skills and/or language comprehension abilities. In the ANS dataset, we calculated  
7 the Weber fraction for each participant, representing the participant's ANS acuity<sup>14</sup>. In the HCP  
8 math/story dataset, we calculated two measures of the inverse efficiency score (IES) for each  
9 participant, representing the participant's arithmetic skills and language comprehension abilities,  
10 respectively<sup>40</sup>. Larger scores of Weber fraction or IES performance indicate poorer numerosity  
11 acuity or arithmetic skills, respectively. The mean performance for these behavioral tasks of all  
12 datasets was shown in Table 1.

13       Because the Jarque-Bera tests of normality revealed that these behavioral scores were not  
14 normally distributed (Fig. 1 B-E), we thus used Spearman's rank correlation for the edge  
15 selection in establishing the numerosity network during the CPM analysis. Note that the  
16 numerosity network was constructed using the ANS primary dataset and validated using the  
17 ANS validating dataset.

## 18 **Numerosity network can predict the individual differences in the ANS acuity**

19       In the ANS primary dataset (141 participants), using the Shen *et al.* protocol<sup>33</sup>, we adopted  
20 the LOO cross-validation method to test whether the intrinsic FC profile can predict the Weber  
21 fraction. For each LOO iteration, all 141 participants were divided into training (140  
22 participants) and testing (1 left-out participant) sets. In the training set, for each edge between  
23 pair of nodes within the Shen's atlas<sup>41</sup>, we calculated the correlation between its FC and the

1 Weber fraction across participants. Edges showing significant positive or negative correlation  
2 ( $p < 0.01$ ) composed a positive or negative predictive network, respectively. Next, for each of the  
3 140 participants, we calculated the summed strength of all FCs within the positive and negative  
4 networks separately. We constructed a general linear model (GLM) for both the positive and  
5 negative networks by relating the summed strength to the Weber fraction across 140 participants  
6 in the training set. Then, in the testing set, the GLM was used to obtain the predicted Weber  
7 fraction of the left-out participant from his/her summed FC strength within the positive and  
8 negative network separately.

9       Across all 141 LOO iterations, we then calculated the Pearson's correlation between the  
10 observed and predicted Weber fraction scores to evaluate the predictive power. For the positive  
11 networks, the correlation between observed and predicted Weber fractions was significant ( $r =$   
12  $0.204$ ,  $p = 0.015$ ), while for the negative networks, the correlation was non-significant ( $r =$   
13  $0.032$ ,  $p = 0.703$ ) (Fig. 2). We carried out a permutation test to further confirm the reliability of  
14 these results. We shuffled the behavior performance across participants 10,000 times and  
15 calculated the Pearson's correlation coefficients between observed (randomly shuffled) and  
16 predicted Weber fraction. We found that the positive network outperformed the set of 10,000  
17 permutation tests ( $p_{\text{perm}} = 0.0081$ ). In comparison, the negative network did not outperform the  
18 set of 10,000 permutation tests ( $p_{\text{perm}} = 0.3510$ ). There was a significant difference in the  
19 predictive power between the positive and negative networks (Steiger's  $z = 2.67$ ,  $p = 7.6 \times 10^{-3}$ )<sup>42</sup>.  
20 It thus suggests that the strength of the functional connectivity profile within the positive  
21 networks could predict individual differences in ANS acuity. However, the negative network did  
22 not show the predictive ability of the individual differences in ANS acuity. Therefore, in the  
23 subsequent analysis, we focused on the predictive power of the positive network. Note that the

1 predictive ability of the numerosity network cannot be alternatively explained by head motion, as  
2 the average frame-to-frame motion was not correlated with Weber fraction ( $r = -0.0149$ ,  $p =$   
3  $0.8607$ ).

4 Note that the positive networks differed across iterations. Across all 141 iterations, the  
5 number of edges within the positive ranged from 114 to 155. We generated a final numerosity  
6 network by selecting the overlapping edges of the positive networks across all iterations. There  
7 were 87 nodes and 80 edges in the final numerosity network.

8 Then, in the independent validating dataset (112 participants), we evaluated whether the  
9 final numerosity network could successfully predict the individual differences of the ANS acuity.  
10 The correlation between the summed strength of the numerosity network and the Weber fraction  
11 across participants was significant ( $r = 0.236$ ,  $p = 0.012$ ) (Fig. 3 A). We also conducted the same  
12 permutation test to confirm this result further. The numerosity network outperformed the set of  
13 10,000 permutations where we randomly shuffled the behavior performance across participants  
14 ( $p_{\text{perm}} = 0.0060$ ). It thus indicated that the final numerosity network we identified could serve as a  
15 connectome-based neuromarker to predict an individual's ANS acuity reliably.

## 16 **Summed FC strength within the numerosity network can predict arithmetic** 17 **skills**

18 To address our second aim, we further evaluated whether the summed FC strengths within  
19 the numerosity network could predict the individual differences in the arithmetic skills in an  
20 HCP math/story dataset. We found that the summed FC strengths within the numerosity network  
21 we identified above correlated significantly with the IESs in the math task ( $r = 0.247$ ,  $P = 0.006$ )  
22 (Fig. 3 B). The numerosity network also outperformed the set of 10,000 permutation tests where  
23 we randomly shuffled the IES performance in the math task across participants ( $P_{\text{perm}}=0.0025$ ).



1 The greater the summed FC strength within the numerosity network, the larger the IES measure  
2 of the arithmetic skills. Greater summed FC strength within the numerosity network pointed to  
3 both the higher Weber fraction (i.e., poorer numerosity precision) in the NC task and the larger  
4 IES (i.e., poorer arithmetic skills) in the math task. It thus indicates that the numerosity network  
5 could also predict the performance of arithmetic skills, even in a completely new dataset.

6 We next evaluated whether the numerosity network could predict the IES of the story task.  
7 We found that the summed FC strength within the numerosity network could not predict the IES  
8 in the story task ( $r = 0.109$ ,  $P = 0.234$ ) (Fig.3 C). We again ran permutation tests and found that  
9 the numerosity network failed to outperform the set of 10,000 permutations where we randomly  
10 shuffled the IES performance in the story task across participants ( $P_{\text{perm}}=0.1161$ ).

11 In short, these findings suggest that the numerosity network could only predict the  
12 individual differences in the arithmetic skills in specific, but not language comprehension  
13 abilities in general.

#### 14 **Anatomical locations of network edges**

15 We also examined the Anatomical locations of network edges within the numerosity  
16 network. The numerosity neuromarker involves a distributed neural network in the neocortex  
17 (Fig. 4B). As shown in Fig. 4A, in the numerosity network, 45 nodes were in the right  
18 hemisphere, and 42 nodes were in the left hemisphere. 18, 17, 13, 13, 12, 11, and 3 nodes located  
19 in seven macroscale regions (i.e., the temporal, prefrontal, motor, limbic, occipital, parietal, and  
20 insula) in Shen's atlas <sup>41</sup> (Fig. 4C). Contralateral connections (50 edges) were more common  
21 than ipsilateral connections (30 edges) in the numerosity network ( $\chi^2(1) = 5.0022$ ,  $p = 0.0253$ ).  
22 There were 19 right-right connections and 11 left-left connections in the numerosity network  
23 ( $\chi^2(1) = 2.3793$ ,  $p = 0.1229$ ).

1       The numerosity networks include many numerosity-related brain regions previously  
2 revealed, such as the early visual cortex <sup>43</sup>, parietal sensory cortex <sup>26</sup>, angular gyrus <sup>44</sup>, medial  
3 temporal gyrus (MTG) <sup>27</sup>, the motor cortex <sup>45</sup>, and prefrontal cortex <sup>18</sup>. However, some regions in  
4 the numerosity network, such as the visual association cortex, inferior temporal gyrus (ITG), and  
5 fusiform gyrus, have not been reported to be involved in processing numerosity information. The  
6 occipital (primary visual and visual association) nodes mostly connect to parietal and motor  
7 regions (Fig. 5A). There are dense connections between left temporal nodes and right motor,  
8 right parietal regions (Fig. 5B, 5C). The PFC nodes mainly connect within the lobes (Fig. 5D).  
9 Detailed information of all nodes and edges could be found in supplementary materials.

10       In addition, we investigated hub nodes in the numerosity network by ranking all nodes  
11 according to their degree centrality <sup>46</sup> (DC; i.e., the number of direct functional connections  
12 between a given node and the rest nodes within the numerosity network). The top 27 nodes with  
13 high DC are presented in Table 2 (DC>1). Regions with the highest DC indicates the hub regions  
14 of the numerosity network, including brain regions in the occipital (e.g., right primary visual  
15 cortex, Brodmann area (BA) 17, DC = 11), motor (e.g., right premotor cortex, BA 6, DC = 6),  
16 and temporal (e.g., left ITG, BA 20, DC = 5) cortex.

17

## 18 **Discussion**

19       In the present study, using the CPM analysis, we obtained a numerosity network based on  
20 the numerosity comparison task, whose strength could reliably predict the individual differences  
21 in the ANS acuity among individuals. This identified numerosity network consisted of functional  
22 connections between distributed brain regions, suggesting that a whole-brain, widely distributed  
23 numerosity network could serve as a reliable neuromarker for an individual's non-symbolic

1 numerosity ability. The robust predictive power of this numerosity neuromarker was further  
2 verified in a completely new dataset with the same behavioral task.

3       Only the positive network could predict individual differences in the ANS acuity. The  
4 negative network could not reliably predict the ANS acuity among individuals. Similar to our  
5 results, in predicting individual gF score<sup>34</sup>, the negative network also showed less accurate  
6 predictions than the positive network. When the nodes were restricted within frontoparietal  
7 networks, the positive-feature models showed significant prediction results. In contrast, negative-  
8 feature models didn't show significant predictive power<sup>34</sup>. The reason for the inability of the  
9 negative network to predict the individual differences in the ANS acuity still needs future  
10 investigation.

11       Another significance of our study was that the numerosity neuromarker we identified could  
12 also specifically predict individual differences in arithmetic skills. In the literature of numerosity  
13 perception, many studies have found a positive correlation between numerosity precision and  
14 cognitive arithmetic skills<sup>14, 47</sup>, suggesting that the number sense may serve as a 'start-up' tool  
15 for mathematics acquisition<sup>13</sup>. Our results provided a neural basis for this important link,  
16 suggesting that numerosity perception and arithmetic skills may share similar functional  
17 networks. On the contrary, this numerosity network could not predict language comprehension  
18 abilities, consistent with previous findings that mathematical processing relies on specific brain  
19 areas and dissociates from language processing<sup>48, 49, 50</sup>.

20       The increased strength of the numerosity network was indicative of poor numerosity acuity  
21 or arithmetic skills. It seems to be counterintuitive. However, there were two possible  
22 explanations for this finding. One possible explanation was that this result might reflect a kind of  
23 compensatory mechanism<sup>51</sup>. The participants with poor numerosity acuity need more sensory

1 representation of the stimulus. Another possible explanation was that the strength of the  
2 numerosity network might represent the control ability to inhibit non-numerical magnitude  
3 information when extracting numerosity information, which can characterize numerosity  
4 information more accurately <sup>52, 53, 54, 55, 56</sup>. However, our current findings cannot provide direct  
5 evidence to support any of these two accounts. Therefore, further investigations are needed to  
6 address this issue.

7       At the node level, the numerosity network involves multiple distributed regions, such as  
8 occipital regions (early visual cortex, visual association), sensorimotor regions (premotor cortex,  
9 supplementary motor cortex, primary sensory cortex), temporal regions (ITG, temporopolar area,  
10 and fusiform), and prefrontal areas (Frontopolar area and orbitofrontal cortex). Most of these  
11 regions have been suggested to involve in numerosity processing. For instance, Previous studies  
12 show that numerosity processing involves at least two temporal stages in the visual cortex <sup>57</sup>.  
13 Subsequent studies found that the earliest activity likely arises from areas such as V2 and V3 <sup>24</sup>.  
14 The sensorimotor cortex is suggested to be involved in a generalized system with quantitative  
15 information processing <sup>45</sup>. In monkeys, neurons in the parietal sensorimotor area respond to the  
16 number of self-generated motor actions <sup>58</sup>. A link between mathematics acquisition and motor  
17 skills has also been reported in children with learning disabilities, showing a correlation between  
18 motor skills and proficiency in solving mathematical problems <sup>59</sup>. Both premotor and parietal  
19 areas get additional activation during verbal counting of visual and auditory items <sup>60</sup>. Studies in  
20 humans <sup>61, 62</sup> indicated parts of the parietal cortex as a core number system that processes  
21 symbolic and non-symbolic numerical magnitude. There is also evidence that single-neuron  
22 activity from the medial temporal lobe (MTL) encoded numerical information when participants  
23 performed calculation tasks on symbolic and non-symbolic stimuli <sup>27</sup>. Neurons in the lateral

1 prefrontal cortex responded selectively to a specific number of items (i.e., numerosity) in visual  
2 multiple-dot displays<sup>63</sup>. Therefore, the numerosity system might rely on the cooperative work of  
3 multiple distributed brain regions.

4 At the edge level, in the numerosity network, occipital regions are connected with angular  
5 gyrus, ITG, and fusiform gyrus, which could be conceptualized as a communication process  
6 between visual input and visual information extraction, such as visual recognition, spatial  
7 orientation, semantic representation processing. Moreover, the numerosity network did include  
8 many connections between occipital nodes and sensorimotor nodes, indicating the interaction  
9 between visual perception, action planning, and execution in the numerosity system. These  
10 results show a crucial role of the sensorimotor cortex in the numerosity system and the strong  
11 interaction between different perceptual features in the numerosity system<sup>45</sup>. In addition, the  
12 numerosity network shows dense connections between left temporal and right premotor, and  
13 between left temporal and right parietal sensorimotor regions. These connections may present  
14 functional coupling between ventral and dorsal areas of the numerosity system. The numerosity  
15 network also shows connections within the prefrontal lobe. A nonverbal quantification system  
16 resides in a dedicated parietal-frontal brain network in primates<sup>64</sup>. However, our numerosity  
17 network did not contain any parietal-frontal connections. Our findings provided a  
18 complementary measure of numerosity perception and arithmetic skills to traditional approaches  
19 that focused on the specific function of discrete brain regions.

20 However, it remains an open question whether the numerosity network we identified could  
21 predict changes in ANS acuity during development. Previous research has revealed that the  
22 precision of numerical acuity is sharpened with age and the acquisition of formal mathematical  
23 education, which may reflect an ability to focus on numerical information while filtering out

1 non-numerical information<sup>53, 54, 55, 56, 65</sup>. Testing the change of the numerosity network  
2 associated with the within-individual changes in numerosity perception and mathematical  
3 abilities over years can inform the common and distinct functional architecture of these  
4 processes during development. In particular, it can provide insights into how functional brain  
5 organization reflects risk for or resilience to impairments such as developmental dyscalculia or  
6 mathematical difficulties, potentially informing early treatments or interventions.

7 A limitation of our study is that the ANS acuity and arithmetical skills were only assessed  
8 by specific paradigms. And we didn't include the investigation of symbolic number  
9 representation. Further research could include various number-related tasks to verify our findings  
10 or address the common and distinct functional architecture of these tasks related to number  
11 perception and mathematical abilities.

12

## 13 **Methods**

### 14 **Overview**

15 In the primary ANS dataset, we constructed a numerosity CPM based on their behavior  
16 performance in an NC task and their resting-state fMRI data, to predict the individual differences  
17 in the ANS acuity, using a leave-one-out cross-validation procedure. The reliability of the  
18 identified numerosity network was verified in an independent validating ANS dataset with the  
19 same NC task. Then in the HCP math/story dataset, we examined whether the identified  
20 numerosity network could predict the individual differences in the arithmetic skills.

### 21 **ANS dataset**

22 **Participants.** The behavioral data, and the structural and resting-state fMRI data were collected  
23 from two batches of college students (Batch A and Batch B). Data from the Batch A (154

1 participants; age: 20–25; mean = 21.66, SD = 1.07; 65 males) was used to construct the  
2 numerosity CPM. Data from the Batch B (145 participants; age: 20–25, mean = 21.39, SD =  
3 0.91; 36 males) was used to validate the reliability of the numerosity network. Batch A and  
4 Batch B datasets correspond to the ANS primary and validating datasets, respectively. All  
5 participants have no history of neurological disorder (e.g., mental retardation, traumatic brain  
6 injury) or psychiatric illness. The experimental protocol was approved by the Institutional  
7 Review Board of Beijing Normal University. Written informed consent was obtained from all  
8 participants before the study.

9 *NC task.* Similar to previous research <sup>14</sup>, a classical NC paradigm was used to measure  
10 participants' ANS acuity. In each trial, a spatially intermixed blue and yellow dot display was  
11 presented on a computer screen for 750 ms (Fig1. A). Participants indicated which color was  
12 more numerous by the keypress. The ratio between the two sets of colored dots varied at 11  
13 levels, including 12:11, 11:10, 10:9, 9:8, 8:7, 7:6, 6:5, 10:8, 8:6, 9:6, and 12:6. The color of the  
14 dots set was counterbalanced across trials. Dot-size of each ratio level was controlled: the  
15 average blue dot size variation was equal to the variation range of the average yellow dot size.  
16 Participants completed forty test trials after practicing five practice trials.

17 The minimum distinguishable difference between numbers of blue and yellow dots that  
18 produces a noticeable response was estimated as each participant's ANS acuity known as the  
19 Weber fraction. The Weber fraction of each participant was estimated by a QUEST routine <sup>66, 67,</sup>  
20 <sup>68</sup>. The QUEST routine provides a given number of sequential trials and updating the probability  
21 distribution function (PDF) of Weber fraction based on the participant's response and current  
22 PDF, following the Bayes' Rule. After the final trial, the mean value of PDF was recorded as the

1 participant's Weber fraction and used to represent the participant's ANS acuity. Thus, a greater  
2 Weber fraction score corresponds to the poorer ANS acuity.

3 Participants with divergent estimating sequences were excluded by visual inspection.  
4 Participants with Weber fraction greater than 0.5 were also excluded from the subsequent  
5 analysis (e.g., Weber fraction greater than 0.5 means an inability to distinguish 12 dots from 6  
6 dots). In sum, 13 participants in the ANS primary dataset and 25 participants in the ANS  
7 validating dataset were excluded from further analysis.

8 ***MRI data and preprocessing.*** The structural and resting-state fMRI data were acquired in the  
9 same session. The MRI data were acquired from a Siemens 3T Trio scanner (MAGENTOM  
10 Trio, a Tim system) with a 12-channel phased-array head coil at the BNU Imaging Center for  
11 Brain Research, Beijing, China. T1-weighted structure images were acquired with a  
12 magnetization-prepared rapid gradient-echo (MPRAGE) sequence (TR/TE/TI = 2.53 s/3.45  
13 ms/1.1 sec, FA = 7 degrees, voxel size = 1×1×1 mm, slice thickness = 1.33 mm, number of  
14 volumes = 128) for each participant. The resting-state data was acquired using a T2\*-weighted  
15 GRE-EPI sequence with different parameters from task-state fMRI (TR = 2000 ms, TE = 30 ms,  
16 flip angle = 90 degrees, number of slices = 33, voxel size = 3.125 × 3.125 × 3.6 mm).

17 Resting-state fMRI images were preprocessed using the FMRI Expert Analysis Tool  
18 version 5.98, part of FMRIB's Software Library ([www.fmrib.ox.ac.uk/fsl](http://www.fmrib.ox.ac.uk/fsl)). The first four  
19 volumes of each participant were discarded to allow for the stabilization of magnetization. In  
20 addition to head-motion correction, brain extraction, spatial smoothing (FWHM = 6 mm), grand-  
21 mean intensity normalization, and removing a linear trend, several other preprocessing steps  
22 were also used to reduce spurious variance. These steps included using a temporal band-pass  
23 filter (0.01–0.08 Hz) to retain only low-frequency signals, and regression of the time course



1 obtained from motion correction parameters, the mean signals of the cerebrospinal fluid and  
2 white matter, and the first derivatives of these signals. Then, all functional images were aligned  
3 to the structural images using FMRIB's linear image registration tools and warped to the  
4 MNI152 template using FMRIB's nonlinear image registration tool. Since head motion might  
5 confound functional connectivity analyses, in the validating dataset, we excluded eight  
6 participants with frame-to-frame head motion estimation greater than 0.15<sup>34</sup>. Finally, 141  
7 participants were retained in the ANS primary dataset, and 112 participants were retained in the  
8 ANS validating dataset. There was no correlation between head motion and Weber fraction in  
9 the retained participants of both datasets (the primary dataset:  $r = -0.0149$ ,  $p = 0.8607$ ; the  
10 validating dataset:  $r = -0.0068$ ,  $p = 0.9433$ ).

11 ***Functional connectivity calculation.*** FC was calculated between ROIs or “nodes” in Shen's  
12 atlas, which maximized the similarity of the time series of the voxels within each node<sup>41,69</sup>. A  
13 subset of nodes of the 268-node functional brain atlas was used in our study because some  
14 resting-fMRI scans did not cover the full brainstem and cerebellum. We thus focused on nodes in  
15 the neocortex by removing all nodes of the cerebellum, brainstem, and subcortex (67 nodes  
16 totally). The remained 201 nodes were shown in Fig. S1. The mean time course of each node was  
17 extracted as a measure of spontaneous neural activity in that node. Pearson's correlation  
18 coefficients ( $r$ ) were calculated between the time courses of each pair of nodes and normalized  
19 using Fisher's  $r$ -to- $Z$  transformation. Finally, a 201×201 FC matrix was obtained for each  
20 participant in the primary dataset and the validating dataset.

## 21 **HCP dataset**

22 ***Participants.*** Data for evaluating the numerosity network's predictive power in predicting the  
23 individual differences in mathematical and language comprehension abilities were from the

1 Human Connectome Project (Q1 and Q2 HCP data releases; 131 participants; age: 22–35; 30  
2 males). Resting-state fMRI data of both left-right (LR) and right-left (RL) phase-encoding runs  
3 (HCP filenames: rfMRI\_REST1) were included in subsequent analysis. Consistent with the  
4 preprocessing procedure of the ANS dataset, we also excluded seven participants with frame-to-  
5 frame head motion estimation greater than 0.15 (violated in either of LR or RL phase-encoding  
6 runs, HCP: Movement\_RelativeRMS\_mean).

7 ***Behavioral Test.*** In the HCP language math/story task, participants answered math-related and  
8 story-related questions after hearing auditory blocks. The HCP language task consists of two  
9 runs that each interleaves four blocks of math task and four blocks of story task<sup>70</sup>. The math task  
10 engages participants' attention continuously with mental arithmetic. The math task includes  
11 auditory trials and requires participants to complete addition and subtraction problems, followed  
12 by a 2-alternative forced-choice task. For example, "Four plus twelve minus two plus nine equals  
13 *twenty-two* or *twenty-three*?" The math task is adaptive to maintain a similar level of difficulty  
14 across participants. The story task includes brief and engaging auditory stories (5-9 sentences)  
15 adapted from Aesop's fables. For example, after a story about an eagle that saves a man who had  
16 done him a favor, participants were asked the question of "That was about *revenge* or  
17 *reciprocity*?" For both tasks, participants push a button to select either the first or the second  
18 choice. Median reaction time and accuracy were recorded for both math and story tasks (HCP  
19 math task: Language\_Task\_Math\_Acc and Language\_Task\_Math\_Median\_RT, HCP story task:  
20 Language\_Task\_Story\_Acc and Language\_Task\_Story\_Median\_RT).

21 We calculated the inverse efficiency score (IES) to integrate response time and accuracy<sup>40</sup>.  
22 The IES was calculated as median response time divided by accuracy, to evaluate mathematical  
23 and language comprehension abilities. There was no correlation between head motion and IES in

1 the remaining set of  $n = 124$  participants for math and story tasks (LR: IES of Math  $r = 0.05$ ,  $p =$   
2  $0.5588$ , IES of Story  $r = -0.03$ ,  $p = 0.76$ ; RL: IES of Math  $r = 0.01$ ,  $p = 0.9114$ , IES of Story  $r = -$   
3  $0.09$ ,  $p = 0.32$ ).

4 ***MRI data and preprocessing.*** The HCP minimal preprocessing pipeline was used for the HCP  
5 data set <sup>71</sup>. This pipeline includes artifact removal, motion correction, and registration to standard  
6 space. After this pipeline, several standard preprocessing procedures, including linear detrend,  
7 temporal filtering (0.01-0.1Hz), regression of 12 motion parameters (HCP data; these include  
8 first derivatives, given as Movement\_Regressors\_dt.txt) and mean time courses of the white  
9 matter and CSF as well as the global signal, were applied to the fMRI data <sup>34</sup>. No spatial  
10 smoothing was used in HCP MRI dataset preprocessing.

11 ***Functional connectivity calculation.*** All steps to construct resting-state FC networks were  
12 identical to those used in the ANS dataset. Data from both LR and RL phase-encoding runs were  
13 used to calculate connectivity matrices, respectively. The average of these two connectivity  
14 matrices was used as the participants' connectivity matrices. Then a  $201 \times 201$  FC matrix was  
15 obtained for each participant.

## 16 **Numerosity CPM and numerosity network**

17 ***Numerosity CPM.*** Numerosity CPM was established to predict individual differences in the  
18 ANS acuity, using a leave-one-out (LOO) procedure <sup>35,36</sup>. One participant was left out for each  
19 LOO iteration as the testing set, and the remaining participants were regarded as the training set.  
20 The Spearman's rank correlation was calculated across participants between functional  
21 connectivity of each edge in the FC matrix and Weber fraction. Consistent with previous  
22 research <sup>35</sup>, for each LOO iteration, in the training set, the edges showing significant positive or  
23 negative correlation with a  $p$ -value below a threshold ( $p < 0.01$ ) across participants were included

1 in a positive or negative network, respectively. The network strength of the training participant  
2 was defined as the participant's summed strength of all FCs within the positive or negative  
3 network. A general linear model (GLM) was fit to relate the summed strengths to the Weber  
4 fraction for positive and negative networks, respectively. Then, in the testing set, the GLM was  
5 used to obtain the predicted Weber fraction of the left-out participant from his/her summed FC  
6 strength within the positive and negative network. After the LOO procedure was repeated for  
7 each participant iteratively, we calculated the Pearson's correlation coefficient between the  
8 observed and predicted Weber fractions across all participants to evaluate the predictive power.  
9 The standard deviation (SD) method was applied to the Weber fraction to remove participants  
10 with an outlier of the Weber fraction. The Weber fraction of each participant was within the  
11 range of  $\pm$  three times SD around the mean value. No participant was removed from the ANS  
12 primary dataset.

13 ***Permutation test.*** To confirm the reliability of prediction results, we fixed the predicted Weber  
14 fraction and shuffled the observed Weber fraction across participants 10,000 times. We  
15 calculated the Pearson's correlation between predicted and observed (randomly shuffled) scores.  
16 The number of times that the correlation coefficients in the set of 10,000 permutation tests  
17 outperformed the correlation coefficient from the numerosity CPM divided by 10,000 was  
18 recorded as permutation test probability.

19 ***Numerosity network.*** Note that the positive or negative networks differed across iterations. To  
20 obtain a unique numerosity network, we generated a final numerosity network by selecting the  
21 overlapping edges across all LOO iterations' network of the numerosity CPM (i.e., the overall  
22 network consisted of edges found in all LOO iterations). Then, the numerosity neuromarker was  
23 defined as the summed FC strength within the final numerosity network in this study. We

1 evaluated the predictive power of the numerosity neuromarker on several datasets, including an  
2 independent ANS dataset and an HCP math/story dataset. Note that we used the numerosity  
3 network to denote the final numerosity network.

#### 4 **The predictive power of numerosity network**

5 *The predictive power of numerosity network on ANS validating dataset.* The ANS validating  
6 dataset was used to confirm the reliable predictive power of the numerosity network to an  
7 independent dataset with the same NC task. To evaluate the predictive power of the numerosity  
8 network, we calculated the Pearson's correlation coefficients between the summed strength of the  
9 numerosity network and the Weber fraction of the ANS validating dataset. The standard  
10 deviation (SD) method (beyond the range of  $\pm$  three times SD around the mean value) was used  
11 to exclude participants with outlier behavior performance from the correlation analysis. No  
12 participant was excluded from the ANS validating dataset.

13 *Permutation test.* To confirm the significance of results on the ANS validating dataset, we fixed  
14 the strength of the numerosity network and shuffled the observed Weber fraction 10,000 times,  
15 and calculated the Pearson's correlation coefficients between them. Permutation test probability  
16 was calculated by the number of times that correlation coefficients in a set of 10,000 permutation  
17 tests outperformed the predictive power of the numerosity network, then divided by 10,000.

18 *The predictive power of numerosity network on HCP dataset.* The HCP (math/story) dataset  
19 was used to evaluate the predictive ability of the numerosity network to arithmetic skills and  
20 language comprehension abilities. The predictive power of the numerosity network is evaluated  
21 by Pearson's correlation coefficients between the strength of the numerosity network and the  
22 behavioral performance of the HCP math/story dataset. Two participants (participant ID:

1 172332, 217429) in the HCP math task and two participants (participant ID: 193239, 255639) in  
2 the HCP story task were excluded because their performances were beyond the range of  $\pm$  three  
3 times SD around the mean value. These four participants were excluded from the correlation  
4 analysis. Permutation test procedures were the same as those for the ANS validating dataset.

5 ***Anatomical distribution of numerosity network.*** To determine the anatomical location of the  
6 numerosity network, we grouped the 201 nodes into seven macroscale regions, including the  
7 prefrontal (PFC), motor (Mot), insular (Ins), parietal (Par), temporal (Tem), occipital (Occ), and  
8 limbic systems (Lim). We calculated the number of functional connections within or between all  
9 the seven macroscale regions. To investigate the hub nodes in the numerosity network, we  
10 ranked all nodes according to their degree centrality (DC; i.e., the number of direct functional  
11 connections between a given node and the rest nodes within the numerosity network). . The  
12 nodes and edges of the numerosity network were presented using BrainNet Viewer (V1.70,  
13 [www.nitrc.org/projects/bnv](http://www.nitrc.org/projects/bnv))<sup>72</sup>.

14

## 15 **References**

- 16 1. Feigenson L, Dehaene S, Spelke E. Core systems of number. *Trends in Cognitive*  
17 *Sciences* **8**, 307-314 (2004).
- 18
- 19 2. Barth H, Kanwisher N, Spelke E. The construction of large number representations in  
20 adults. *Cognition* **86**, 201-221 (2003).
- 21
- 22 3. Pica P, Lemer C, Izard V, Dehaene S. Exact and Approximate Arithmetic in an  
23 Amazonian Indigene Group. *Science (New York, NY)* **306**, 499-503 (2004).
- 24
- 25 4. Xu F, Spelke ES. Large number discrimination in 6-month-old infants. *Cognition* **74**, B1-  
26 B11 (2000).

27

- 1 5. Nieder A, Mller E. A parieto-frontal network for visual numerical information in the  
2 monkey. *Proceedings of the National Academy of Sciences of the United States of*  
3 *America* **101**, 7457-7462 (2004).
- 4
- 5 6. Agrillo C, Parrish AE, Beran MJ. How Illusory Is the Solitaire Illusion? Assessing the  
6 Degree of Misperception of Numerosity in Adult Humans. *Frontiers in Psychology* **7**,  
7 (2016).
- 8
- 9 7. Piffer L, Agrillo C, Hyde DC. Small and large number discrimination in guppies. *Animal*  
10 *Cognition* **15**, 215-221 (2012).
- 11
- 12 8. Nasr K, Viswanathan P, Nieder A. Number detectors spontaneously emerge in a deep  
13 neural network designed for visual object recognition. *Science advances* **5**, eaav7903  
14 (2019).
- 15
- 16 9. Kim G, Jang J, Baek S, Song M, Paik S-B. Visual number sense in untrained deep neural  
17 networks. *Science advances* **7**, eabd6127 (2021).
- 18
- 19 10. Zhou C, *et al.* Numerosity representation in a deep convolutional neural network. *Journal*  
20 *of Pacific Rim Psychology* **15**, 18344909211012613 (2021).
- 21
- 22 11. Geary DC, Moore AM. Chapter 4 - Cognitive and brain systems underlying early  
23 mathematical development. In: *Progress in Brain Research* (eds Cappelletti M, Fias W).  
24 Elsevier (2016).
- 25
- 26 12. Gross HJ, Pahl M, Si A, Zhu H, Tautz J, Zhang S. Number-based visual generalisation in  
27 the honeybee. *PloS one* **4**, e4263 (2009).
- 28
- 29 13. Piazza M. Neurocognitive start-up tools for symbolic number representations. *Trends in*  
30 *Cognitive Sciences* **14**, 542-551 (2010).
- 31
- 32 14. Halberda J, Mazocco MM, Feigenson L. Individual differences in non-verbal number  
33 acuity correlate with maths achievement. *Nature* **455**, 665-668 (2008).
- 34
- 35 15. Nieder A. The neuronal code for number. *Nature Reviews Neuroscience* **17**, 366-382  
36 (2016).
- 37
- 38 16. Viswanathan P, Nieder A. Neuronal correlates of a visual “sense of number” in primate  
39 parietal and prefrontal cortices. *Proceedings of the National Academy of Sciences* **110**,  
40 11187 (2013).

- 1  
2 17. Nieder A. Supramodal numerosity selectivity of neurons in primate prefrontal and  
3 posterior parietal cortices. *Proceedings of the National Academy of Sciences* **109**, 11860  
4 (2012).
- 5  
6 18. Ramirez-Cardenas A, Nieder A. Working memory representation of empty sets in the  
7 primate parietal and prefrontal cortices. *Cortex* **114**, 102-114 (2019).
- 8  
9 19. Piazza M, Izard V, Pinel P, Le Bihan D, Dehaene S. Tuning Curves for Approximate  
10 Numerosity in the Human Intraparietal Sulcus. *Neuron* **44**, 547-555 (2004).
- 11  
12 20. Harvey BM, Ferri S, Orban GA. Comparing Parietal Quantity-Processing Mechanisms  
13 between Humans and Macaques. *Trends in Cognitive Sciences* **21**, 779-793 (2017).
- 14  
15 21. Hawes Z, Sokolowski HM, Ononye CB, Ansari D. Neural underpinnings of numerical  
16 and spatial cognition: An fMRI meta-analysis of brain regions associated with symbolic  
17 number, arithmetic, and mental rotation. *Neuroscience & Biobehavioral Reviews* **103**,  
18 316-336 (2019).
- 19  
20 22. Nieder A. Evolution of cognitive and neural solutions enabling numerosity judgements:  
21 lessons from primates and corvids. *Philosophical transactions of the Royal Society of*  
22 *London Series B, Biological sciences* **373**, (2017).
- 23  
24 23. Harvey BM. Quantity Cognition: Numbers, Numerosity, Zero and Mathematics. *Current*  
25 *Biology* **26**, R419-R421 (2016).
- 26  
27 24. Fornaciai M, Brannon EM, Woldorff MG, Park J. Numerosity processing in early visual  
28 cortex. *NeuroImage* **157**, 429-438 (2017).
- 29  
30 25. Park J, Dewind N, Woldorff M, Brannon E. Rapid and Direct Encoding of Numerosity in  
31 the Visual Stream. *Cerebral cortex (New York, NY : 1991)* **26**, (2015).
- 32  
33 26. Lasne G, Piazza M, Dehaene S, Kleinschmidt A, Eger E. Discriminability of numerosity-  
34 evoked fMRI activity patterns in human intra-parietal cortex reflects behavioral  
35 numerical acuity. *Cortex* **114**, 90-101 (2019).
- 36  
37 27. Kutter EF, Bostroem J, Elger CE, Mormann F, Nieder A. Single Neurons in the Human  
38 Brain Encode Numbers. *Neuron* **100**, 753-761.e754 (2018).

39



- 1 28. Dehaene S, Piazza M, Pinel P, Cohen L. THREE PARIETAL CIRCUITS FOR  
2 NUMBER PROCESSING. *Cognitive Neuropsychology* **20**, 487-506 (2003).
- 3
- 4 29. Dehaene S, Cohen L. Cerebral Pathways for Calculation: Double Dissociation between  
5 Rote Verbal and Quantitative Knowledge of Arithmetic. *Cortex* **33**, 219-250 (1997).
- 6
- 7 30. Biswal B, Yetkin FZ, Haughton VM, Hyde JS. Functional connectivity in the motor  
8 cortex of resting human brain using echo-planar MRI. *Magnetic resonance in medicine*  
9 **34**, 537-541 (1995).
- 10
- 11 31. Goense J, Whittingstall K, Logothetis N. Neural and BOLD responses across the brain.  
12 *Wiley Interdisciplinary Reviews: Cognitive Science* **3**, 75-86 (2012).
- 13
- 14 32. Smith SM, *et al.* Functional connectomics from resting-state fMRI. *Trends in Cognitive*  
15 *Sciences* **17**, 666-682 (2013).
- 16
- 17 33. Shen X, *et al.* Using connectome-based predictive modeling to predict individual  
18 behavior from brain connectivity. *Nature Protocols* **12**, 506-518 (2017).
- 19
- 20 34. Emily S, *et al.* Functional connectome fingerprinting: identifying individuals using  
21 patterns of brain connectivity. *Nature neuroscience*, (2015).
- 22
- 23 35. Rosenberg MD, *et al.* A neuromarker of sustained attention from whole-brain functional  
24 connectivity. *Nature Neuroscience* **19**, 165-171 (2016).
- 25
- 26 36. Jangraw DC, *et al.* A functional connectivity-based neuromarker of sustained attention  
27 generalizes to predict recall in a reading task. *NeuroImage* **166**, 99-109 (2018).
- 28
- 29 37. Beaty RE, *et al.* Robust prediction of individual creative ability from brain functional  
30 connectivity. *Proc Natl Acad Sci U S A* **115**, 1087-1092 (2018).
- 31
- 32 38. Wang J, Halberda J, Feigenson L. Approximate number sense correlates with math  
33 performance in gifted adolescents. *Acta Psychologica* **176**, 78-84 (2017).
- 34
- 35 39. Lukowski SL, *et al.* Approximate number sense shares etiological overlap with  
36 mathematics and general cognitive ability. *Intelligence* **65**, 67-74 (2017).
- 37
- 38 40. Townsend J, Ashby FG. Methods of modeling capacity in simple processing systems.  
39 *Cogn Theory* **3**, 200-239 (1978).

- 1  
2 41. Shen X, Tokoglu F, Papademetris X, Constable RT. Groupwise whole-brain parcellation  
3 from resting-state fMRI data for network node identification. *NeuroImage* **82**, 403-415  
4 (2013).
- 5  
6 42. Steiger, James H. Tests for comparing elements of a correlation matrix. *Psychological*  
7 *Bulletin* **87**, 245-251 (1980).
- 8  
9 43. DeWind NK, Park J, Woldorff MG, Brannon EM. Numerical encoding in early visual  
10 cortex. *Cortex* **114**, 76-89 (2019).
- 11  
12 44. Klein E, Willmes K, Bieck SM, Bloechle J, Moeller K. White matter neuro-plasticity in  
13 mental arithmetic: Changes in hippocampal connectivity following arithmetic drill  
14 training. *Cortex* **114**, 115-123 (2019).
- 15  
16 45. Anobile G, Arrighi R, Castaldi E, Burr DC. A Sensorimotor Numerosity System. *Trends*  
17 *in Cognitive Sciences* **25**, 24-36 (2021).
- 18  
19 46. Wang X, Jiao D, Zhang X, Lin X. Altered degree centrality in childhood absence  
20 epilepsy: A resting-state fMRI study. *Journal of the Neurological Sciences* **373**, 274-279  
21 (2017).
- 22  
23 47. Starr A, Libertus ME, Brannon EM. Number sense in infancy predicts mathematical  
24 abilities in childhood. *Proceedings of the National Academy of Sciences* **110**, 18116  
25 (2013).
- 26  
27 48. Amalric M, Dehaene S. A distinct cortical network for mathematical knowledge in the  
28 human brain. *NeuroImage* **189**, 19-31 (2019).
- 29  
30 49. Amalric M, Dehaene S. Origins of the brain networks for advanced mathematics in  
31 expert mathematicians. *Proc Natl Acad Sci U S A* **113**, 4909-4917 (2016).
- 32  
33 50. Amalric M, Dehaene S. Cortical circuits for mathematical knowledge: evidence for a  
34 major subdivision within the brain's semantic networks. *Philosophical transactions of the*  
35 *Royal Society of London Series B, Biological sciences* **373**, (2017).
- 36  
37 51. Voets NL, *et al.* Functional and structural changes in the memory network associated  
38 with left temporal lobe epilepsy. *Human brain mapping* **30**, 4070-4081 (2009).
- 39

- 1 52. Leibovich T, Katzin N, Harel M, Henik A. From sense of number to sense of  
2 magnitud... : The role of continuous magnitudes in numerical cognition. *Behavioral and*  
3 *Brain Sciences* **40**, (2016).
- 4
- 5 53. Piazza M, De Feo V, Panzeri S, Dehaene S. Learning to focus on number. *Cognition* **181**,  
6 35-45 (2018).
- 7
- 8 54. Starr A, DeWind NK, Brannon EM. The contributions of numerical acuity and non-  
9 numerical stimulus features to the development of the number sense and symbolic math  
10 achievement. *Cognition* **168**, 222-233 (2017).
- 11
- 12 55. Wilkey ED, Price GR. Attention to number: The convergence of numerical magnitude  
13 processing, attention, and mathematics in the inferior frontal gyrus. *Human brain*  
14 *mapping* **40**, 928-943 (2019).
- 15
- 16 56. Castaldi E, Mirassou A, Dehaene S, Piazza M, Eger E. Asymmetrical interference  
17 between number and item size perception provides evidence for a domain specific  
18 impairment in dyscalculia. *PloS one* **13**, e0209256 (2018).
- 19
- 20 57. Park J, DeWind NK, Woldorff MG, Brannon EM. Rapid and Direct Encoding of  
21 Numerosity in the Visual Stream. *Cereb Cortex* **26**, 748-763 (2016).
- 22
- 23 58. Sawamura H, Shima K, Tanji J. Numerical representation for action in the parietal cortex  
24 of the monkey. *Nature* **415**, 918-922 (2002).
- 25
- 26 59. Westendorp M, Hartman E, Houwen S, Smith J, Visscher C. The relationship between  
27 gross motor skills and academic achievement in children with learning disabilities.  
28 *Research in Developmental Disabilities* **32**, 2773-2779 (2011).
- 29
- 30 60. Piazza M, Mechelli A, Price CJ, Butterworth B. Exact and approximate judgements of  
31 visual and auditory numerosity: An fMRI study. *Brain Research* **1106**, 177-188 (2006).
- 32
- 33 61. Piazza M, Pinel P, Le Bihan D, Dehaene S. A Magnitude Code Common to Numerosities  
34 and Number Symbols in Human Intraparietal Cortex. *Neuron* **53**, 293-305 (2007).
- 35
- 36 62. Arsalidou M, Taylor MJ. Is 2+2=4? Meta-analyses of brain areas needed for numbers and  
37 calculations. *NeuroImage* **54**, 2382-2393 (2011).
- 38
- 39 63. Nieder A, Freedman DJ, Miller EK. Representation of the quantity of visual items in the  
40 primate prefrontal cortex. *Science (New York, NY)* **297**, 1708-1711 (2002).

- 1  
2 64. Dehaene S, Molko N, Cohen L, Wilson AJ. Arithmetic and the brain. *Current Opinion in*  
3 *Neurobiology* **14**, 218-224 (2004).  
4  
5 65. Piazza M, Pica P, Izard V, Spelke ES, Dehaene S. Education enhances the acuity of the  
6 nonverbal approximate number system. *Psychological science* **24**, 1037-1043 (2013).  
7  
8 66. Watson AB, Pelli DG. Quest: A Bayesian adaptive psychometric method. *Perception &*  
9 *Psychophysics* **33**, 113-120 (1983).  
10  
11 67. Sims J, Pelli D. The Ideal Psychometric Procedure. (1987).  
12  
13 68. Baldassi S, Burr DC. Feature-based integration of orientation signals in visual search.  
14 *Vision Research* **40**, 1293-1300 (2000).  
15  
16 69. Shen X, Papademetris X, Constable RT. Graph-theory based parcellation of functional  
17 subunits in the brain from resting-state fMRI data. *NeuroImage* **50**, 1027-1035 (2010).  
18  
19 70. Binder JR, *et al.* Mapping anterior temporal lobe language areas with fMRI: A  
20 multicenter normative study. *NeuroImage* **54**, 1465-1475 (2011).  
21  
22 71. Glasser MF, *et al.* The minimal preprocessing pipelines for the Human Connectome  
23 Project. *NeuroImage* **80**, 105-124 (2013).  
24  
25 72. Xia M, Wang J, He Y. BrainNet Viewer: a network visualization tool for human brain  
26 connectomics. *PloS one* **8**, e68910 (2013).  
27

## 28 **Acknowledgments**

29 This work was supported by the National Key R&D Program of China (2019YFA0709503),  
30 National Basic Research Program of China (2018YFC0810602), National Nature Science  
31 Foundation of China grant (31671133, 61971289), Shenzhen Science and Technology Research  
32 Funding Program (JCYJ20170412164413575, JCYJ20170412111316339), Fundamental  
33 Research Funds for the Central Universities, and Shenzhen-Hong Kong Institute of Brain  
34 Science-Shenzhen Fundamental Research Institutions.

## 36 **Competing interests**

1           The authors declare no competing interests.

2

### 3   **Data availability**

4   Each participant's functional matrix and behavior performance from the ANS dataset and HCP

5   math/story dataset are available from the authors upon request.

6

### 7   **Code availability**

8   Matlab scripts were written to identify numerosity neuromarker, make predictions from novel

9   individuals' FC matrices, and generalize the numerosity neuromarker to ANS validating dataset

10   and HCP math/story dataset. These codes are available online from

11   <https://github.com/Dzhang1989z/Numerosity-CPM>.

12

# 1 Figures

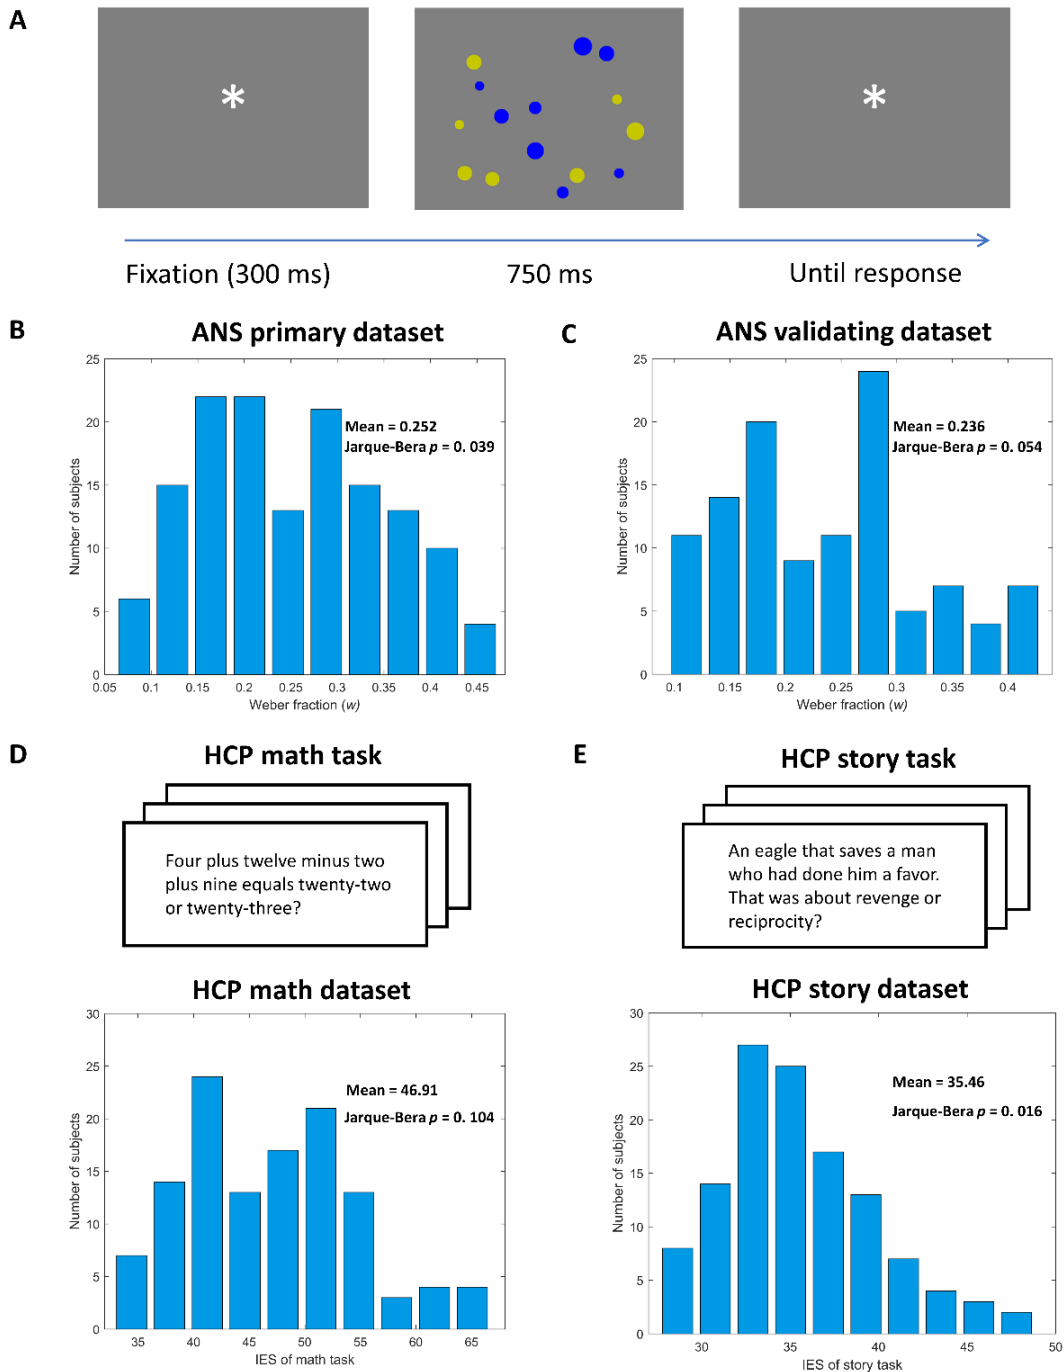

2

3 **Fig 1. Experimental task and group performance for the ANS dataset and HCP story/math dataset.** (A) The paradigm for  
 4 the NC task. (B) Histogram of weber fraction  $w$ , the ANS acuity, for the ANS primary dataset ( $n=141$ ), as determined by a  
 5 psychophysical model for each participant. (C) Histogram of weber fraction  $w$  for the ANS validating dataset ( $n=112$ ). (D/E)  
 6 Experimental task and histogram of the IES performance for the HCP math/story dataset ( $n=120$ ).

7

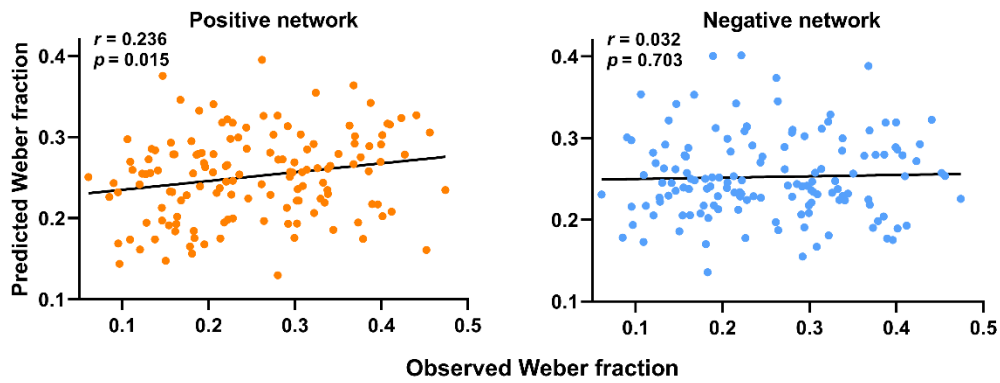

1  
2  
3  
4  
5  
6

**Fig 2. CPMs predict Weber fraction.** Scatter plots show correlations between observed Weber fraction and predictions by positive (left) and negative (right) networks. Network models were iteratively trained on behavior and MRI data from  $n-1$  participants in the ANS primary dataset and tested on the left-out participant. The  $r$  and  $p$ -value above each plot show the Pearson's correlation coefficient between observed and predicted Weber fraction, and corresponding significance level.

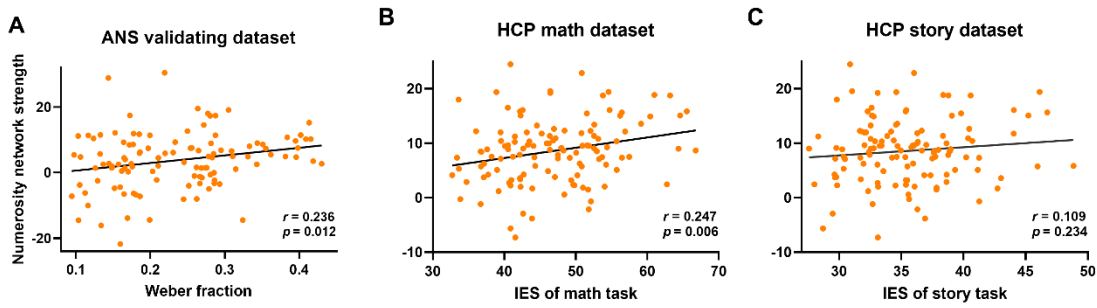

1

2 **Fig 3. The predictive power of numerosity neuromarker on several independent datasets.** Pearson's correlations between  
3 network strength of numerosity network and behavior performance in the ANS validating dataset (A), HCP math dataset (B), and  
4 HCP story dataset (C) were calculated to assess the predictive power of numerosity neuromarker. The meaning of  $r$  and  $p$  shows  
5 the Pearson's correlation coefficient between numerosity network strength and each behavior performance, and corresponding  
6 significance level, respectively.

7



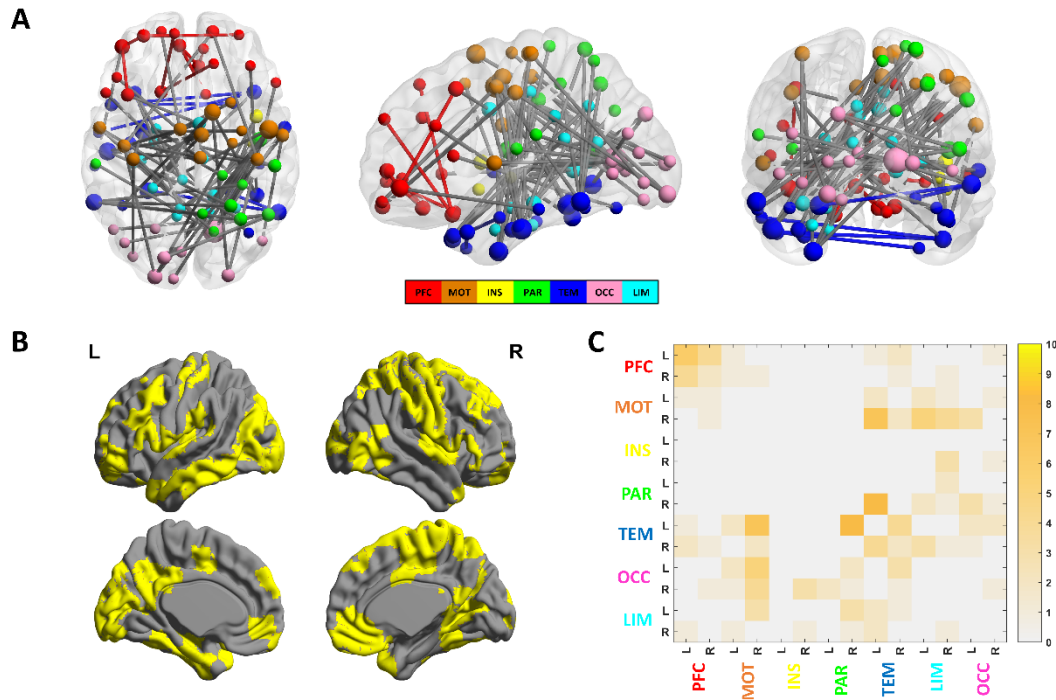

1

2 **Fig 4. Anatomical locations of the numerosity network.** (A) A 3d view of numerosity network edges and nodes on a glass  
 3 brain. Nodes in the cerebellum, subcortical, and brainstem were not included in our analysis. Hence, Macroscale regions include  
 4 the prefrontal cortex (PFC), the motor cortex (Mot), insula (Ins), parietal (Par), temporal (Tem), occipital (Occ), limbic  
 5 (including the cingulate cortex, amygdala, and hippocampus; Lim). The larger size of a node indicates that the node gets a larger  
 6 degree centrality (DC) value. (B) Cortical areas of the numerosity network. (C) All edges are grouped by macroscale region and  
 7 hemisphere (L = left, R= right). Colorbar values indicate the number of edges within or between the macroscale regions.

8

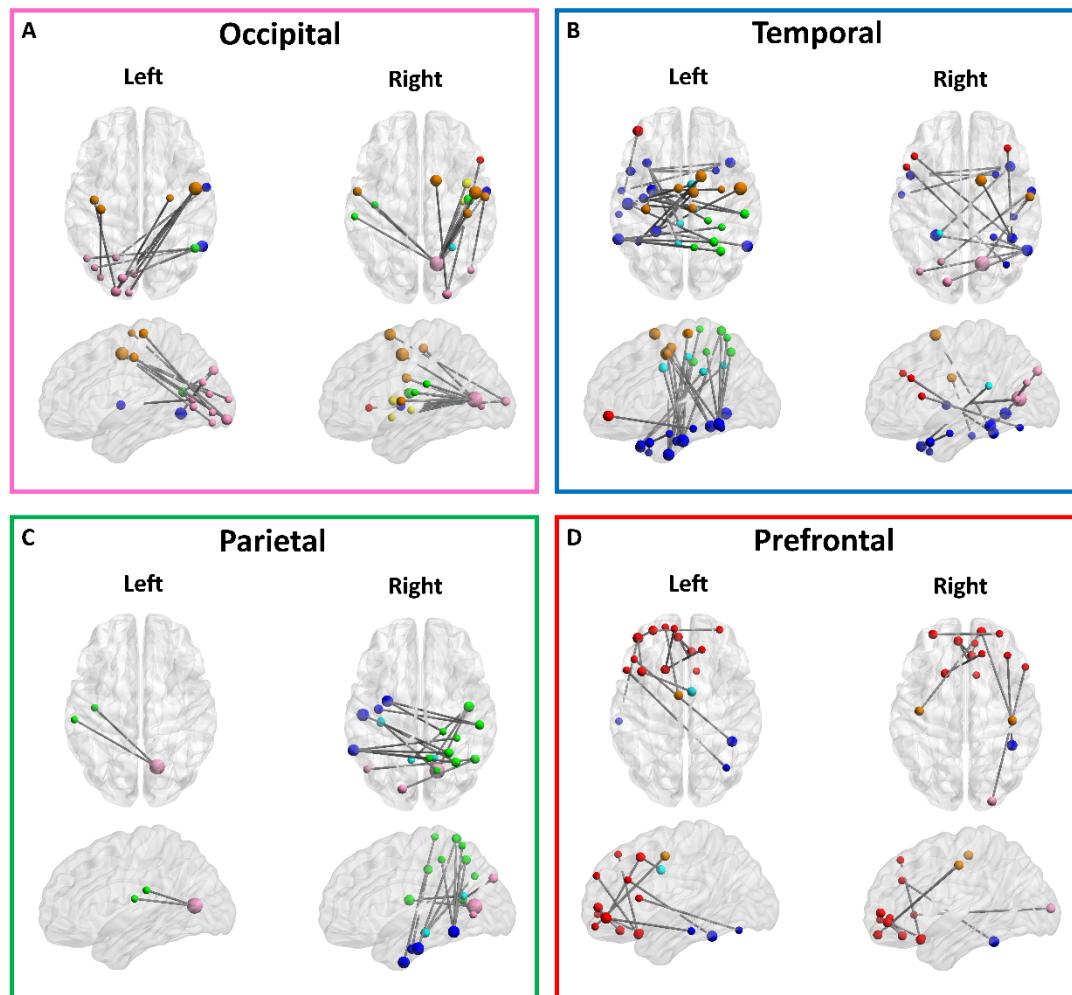

1  
2  
3  
4

**Fig 5. Functional connections in the numerosity network in each of four macroscale regions. (A) occipital, (B) temporal, (C) parietal, and (D) prefrontal regions. Dot color indicates macroscale region as in Fig. 4.**

## 1 Tables

2 **Table 1. Summary of behavioral data.** Jarque-Bera tests indicated significant departures from normality, supporting the use of  
3 Spearman's rank correlations. Because we sought to identify any potential departures from normality, no correction for multiple  
4 comparisons was applied across these tests. All p-values are based on two-tailed tests.

| Task                   | Metric                   | Participant # | Mean   | SD    | Range          | Jarque-Bera(p) |
|------------------------|--------------------------|---------------|--------|-------|----------------|----------------|
| ANS primary dataset    | Weber fraction           | 141           | 0.252  | 0.099 | [0.061, 0.474] | 0.039          |
| ANS validating dataset | Weber fraction           | 112           | 0.236  | 0.088 | [0.094, 0.430] | 0.054          |
| HCP math               | Inverse efficiency score | 120           | 46.910 | 7.713 | [32.72, 66.77] | 0.104          |
| HCP story              | Inverse efficiency score | 120           | 35.461 | 4.290 | [27.58, 48.84] | 0.016          |

5

1 **Table 2. Information of the hub nodes (DC>1) in the numerosity network.**

| No. | DC | Node name                        | L/R | Macroscale region | BA | MNI                   |
|-----|----|----------------------------------|-----|-------------------|----|-----------------------|
| 1   | 11 | Primary visual cortex            | R   | Occipital         | 17 | (14.6, -68.3, 8.3)    |
| 2   | 6  | Premotor cortex                  | R   | Motor             | 6  | (49.2, -4.6, 48.1)    |
| 3   | 5  | Inferior temporal gyrus          | L   | Temporal          | 20 | (-51.8, -18.2, -28.8) |
| 4   | 4  | Fusiform gyrus                   | L   | Temporal          | 37 | (-60.3, -50.0, -14.0) |
| 5   | 4  | Premotor cortex                  | R   | Motor             | 6  | (13.7, 6.3, 65.4)     |
| 6   | 4  | Fusiform gyrus                   | L   | Temporal          | 37 | (-26.7, -42.7, -16.1) |
| 7   | 4  | Fusiform gyrus                   | R   | Temporal          | 37 | (55.2, -56.3, -4.8)   |
| 8   | 4  | Parahippocampal cortex           | L   | Temporal          | 36 | (-30.0, -5.8, -40.9)  |
| 9   | 3  | Fusiform gyrus                   | R   | Temporal          | 37 | (41.6, -45.7, -22.6)  |
| 10  | 3  | Frontopolar area                 | L   | Prefrontal        | 10 | (-42.7, 47.3, -6.9)   |
| 11  | 3  | Temporopolar area                | R   | Temporal          | 38 | (40.0, 18.9, -34.2)   |
| 12  | 3  | Primary sensory cortex           | R   | Parietal          | 1  | (43.3, -10.8, 13.9)   |
| 13  | 3  | Supplementary motor area         | R   | Motor             | 6  | (7.0, -8.1, 52.9)     |
| 14  | 3  | Visual association cortex        | L   | Occipital         | 18 | (-22.3, -96.6, -10.1) |
| 15  | 2  | Orbitofrontal cortex             | L   | Prefrontal        | 11 | (-18.2, 19.0, -21)    |
| 16  | 2  | Ventral anterior cingulate gyrus | R   | Limbic            | 24 | (5.3, -1.0, 35.6)     |
| 17  | 2  | Angular gyrus                    | R   | Parietal          | 39 | (48.9, -58.1, 14.4)   |
| 18  | 2  | Frontopolar area                 | L   | Prefrontal        | 10 | (-6.9, 48.3, -5.7)    |
| 19  | 2  | Orbitofrontal area               | R   | Prefrontal        | 11 | (5.1, 34.9, -17.4)    |
| 20  | 2  | Primary sensory cortex           | R   | Motor             | 1  | (42.0, -23.4, 53.4)   |
| 21  | 2  | Paracentral lobule               | R   | Motor             | 6  | (6.0, -22.3, 65.6)    |
| 22  | 2  | Primary motor cortex             | R   | Motor             | 4  | (57.8, -8.3, 27.3)    |
| 23  | 2  | Inferior temporal gyrus          | L   | Temporal          | 20 | (-49.3, -4.7, -37.4)  |
| 24  | 2  | Visual association cortex        | R   | Occipital         | 18 | (23.7, -96.0, 6.5)    |
| 25  | 2  | Middle frontal gyrus             | L   | Prefrontal        | 8  | (-39.3, 17.2, 46.7)   |
| 26  | 2  | Inferior parietal gyrus          | R   | Parietal          | 40 | (52.8, -27.2, 40.9)   |
| 27  | 2  | Orbitofrontal cortex             | R   | Prefrontal        | 11 | (13.9, 56.8, -16.6)   |

BA, Brodmann area; DC, degree centrality; L, left; R, right.

2  
3

## 1 **Supplementary information**

### 2 **Fine spatial distribution of numerosity network**

3 The ROIs to which the occipital region is connected in numerosity network are visualized in  
4 Fig. 5A. The occipital (primary visual and visual association) nodes are mainly connected to  
5 temporal, parietal and motor regions. To be specific, the left occipital regions connect to right  
6 premotor cortex, left primary motor cortex, left primary sensory cortex, right angular gyrus,  
7 bilateral primary sensory cortex, right superior temporal cortex and right fusiform gyrus; the  
8 right occipital regions connect to right primary motor cortex, bilateral premotor cortex, bilateral  
9 primary sensory cortex, left supramarginal gyrus (SMG) and right superior temporal cortex.

10 The temporal regions played an outsize contribution in the numerosity network (Fig. 5B).  
11 The left temporal and right temporal region show sort of dissimilar connection patterns. The  
12 connection between left temporal (temporopolar area, medial temporal gyrus, inferior temporal  
13 gyrus and fusiform gyrus) nodes and right motor, right parietal regions is especially dense, while  
14 no connections between right temporal and parietal cortex was found. To be specific, the left  
15 temporal nodes mainly connected to several pre-motor nodes, right parietal sensory areas  
16 (located near the intraparietal sulcus, IPS) and bilateral ventral/dorsal posterior cingulate cortex  
17 (PCC); the right temporal nodes connected to a part of bilateral prefrontal cortex (PFC), right  
18 motor cortex, left temporal cortex and bilateral occipital cortex.

19 The ROIs connected to the parietal region are visualized in Fig. 5C. In the parietal region,  
20 most connections locate between right parietal sensory nodes and left temporal cortex, bilateral  
21 occipital cortex, as mentioned previously. The left parietal regions (primary sensory and SMG)  
22 merely connect with the primary visual area. The right parietal regions connect with the left  
23 inferior temporal gyrus (ITG), left fusiform gyrus, left parahippocampal gyrus (PPA), right  
24 primary visual cortex and left visual association cortex.

25 The right motor regions got more dense connections than the left motor regions  
26 (supplementary Fig. 2A). The motor (primary motor/sensory and premotor) nodes are mainly  
27 connected with occipital and temporal cortex. To be specific, the left motor regions connect with  
28 left ITG, left PPA, right primary visual and left visual association nodes; the right motor regions  
29 primarily connect with bilateral ITG, bilateral fusiform gyrus, left PPA, bilateral primary visual  
30 and visual association nodes.

31 The prefrontal cortex shows most connections located within prefrontal lobe (Fig. 5D).  
32 Besides the intra-lobe connections, the left prefrontal regions primarily connect with left  
33 premotor cortex, right fusiform gyrus and left medial temporal gyrus (MTG); the right prefrontal  
34 region connects to right primary sensory/motor cortex, right fusiform gyrus, right visual  
35 association area.

36 The limbic cortex shows connections with all other six macroscale regions excepting insula  
37 (supplementary Fig. 2B). Limbic cortex connects more densely with motor and parietal cortex  
38 than other cortices.

39

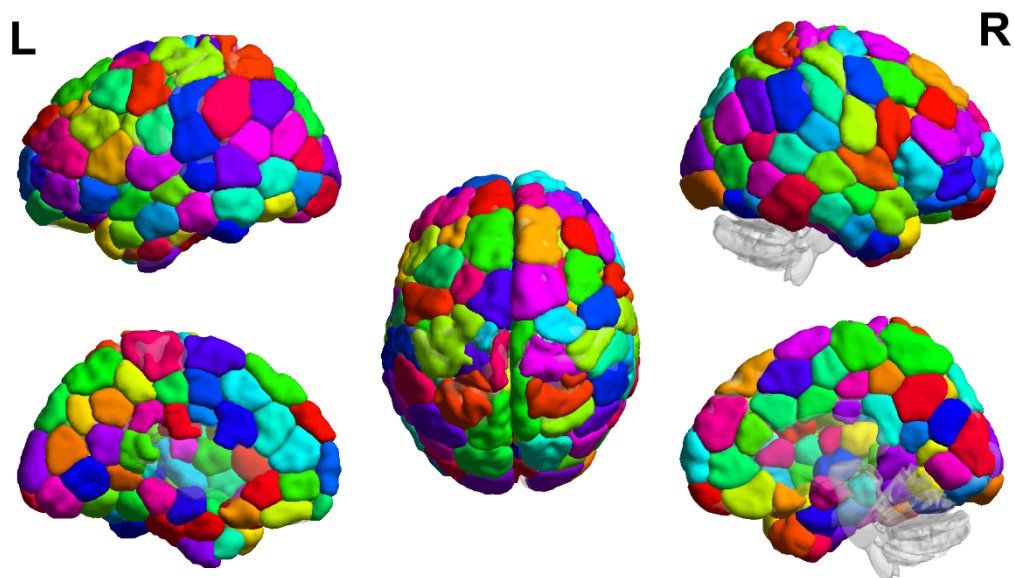

1  
2 **Supplementary Fig. 1. The 201-region functional parcellation used to define network nodes in primary**  
3 **NC dataset.** Colored nodes were included in the FC matrix calculation. All nodes (67 nodes) in the  
4 cerebellum, brainstem, and subcortex were not included in our analysis.  
5

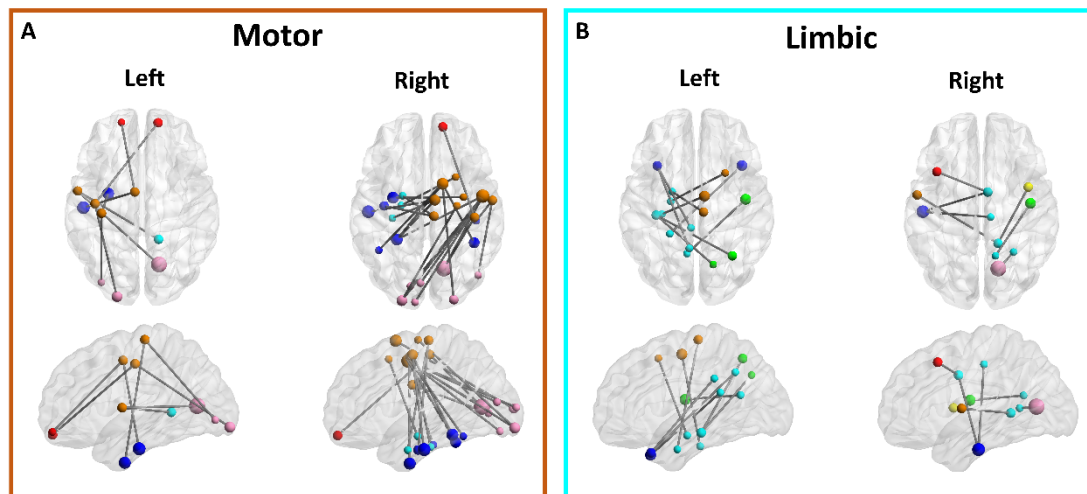

1  
2  
3  
4  
5  
6

**Supplementary Fig. 2. All connections in the numerosity network that include nodes in (A) motor and (B) limbic system. Dot color indicates macroscale region as in Fig. 4.**
